# Supplementary material
Source: Copernicus journal article supplement (doi:10.5194/soil-12-689-2026)
Supplement: Supplementary file 1 [file soil-12-689-2026-supplement.pdf]

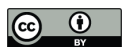

*Supplement of*

## **Operational POM increases are over-interpreted as SOM stabilization: quantifying untransformed straw and biochar residues via magnetic separation**

**Yuhan Xia et al.**

*Correspondence to:* Sen Dou (dousen1959@126.com) and Song Guan (guansong8888@163.com)

The copyright of individual parts of the supplement might differ from the article licence.

Table S1. Analysis of variance of M<sub>P</sub> and OC<sub>P</sub> parameters with main factors (A: Treatments, B: time of incubation).

| Source          | Treatment (A) | Time (B)   | A×B                 |
|-----------------|---------------|------------|---------------------|
| M <sub>P</sub>  | 45.589***     | 4.522**    | 1.258 <sup>ns</sup> |
| OC <sub>P</sub> | 1249.746***   | 219.259*** | 48.849***           |

Notes: Data expressed as the F<sup>P</sup> value in the ANOVA results, \*: P < 0.05; \*\*: P < 0.01; \*\*\*: P < 0.001; ns: no significant.

Table S2. Analysis of variance of POC and SOC parameters with main factors (A: Treatments, B: time of incubation).

| Source | Treatment (A) | Time (B)  | A×B       |
|--------|---------------|-----------|-----------|
| POC    | 361.178***    | 56.936*** | 13.442*** |
| SOC    | 448.049***    | 27.04***  | 9.497***  |

Notes: Data expressed as the F<sup>P</sup> value in the ANOVA results, \*: P < 0.05; \*\*: P < 0.01; \*\*\*: P < 0.001; ns: no significant.

Table S3. Analysis of variance of POM-C Contribution parameters with main factors (A: Treatments, B: time of incubation).

| Source             | Treatment (A) | Time (B)  | A×B      |
|--------------------|---------------|-----------|----------|
| POM-C Contribution | 230.933***    | 41.144*** | 9.423*** |

Notes: Data expressed as the F<sup>P</sup> value in the ANOVA results, \*: P < 0.05; \*\*: P < 0.01; \*\*\*: P < 0.001; ns: no significant.
